# Supplementary material for: Cross-π-conjugated enediyne with multitopic metal binding sites
Source: Royal Society of Chemistry journal article supplement (doi:10.1039/d0ra06320g), 2020-01-01
Supplement: d0ra06320g1.pdf [file d0ra06320g1.pdf]

## Supporting Information

### Cross- $\pi$ -Conjugated Eneidyne with Multitopic Metal Binding Sites

Djawed Nauroozi,<sup>\*a,b</sup> Benjamin Wurster,<sup>a</sup> and Rüdiger Faust<sup>\*a</sup>

<sup>a</sup> Institute for Chemistry and CINSaT – Centre for Interdisciplinary Nanostructure Science and Technology, University of Kassel, Heinrich-Plett-Str. 40, 34132 Kassel, Germany.

<sup>b</sup> Ulm University – Institute for Inorganic Chemistry I, Albert-Einstein-Allee 11, 89081 Ulm, Germany.

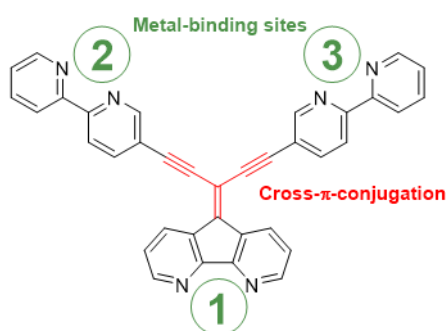

#### Content

|      |                                                            |         |
|------|------------------------------------------------------------|---------|
| I.   | Synthetic procedures                                       | page 2  |
| II.  | $^1\text{H}$ and $^{13}\text{C}$ NMR spectra               | page 4  |
| III. | Mass spectrometry data                                     | page 6  |
| IV.  | UV-vis of (5-ethynyl)-2,2'-bipyridine <b>5</b>             | page 10 |
| V.   | Cyclic voltammetry of (5-ethynyl)-2,2'-bipyridine <b>5</b> | page 10 |
| VI.  | Differential pulse voltammogram of <b>8</b>                | page 11 |
| VII. | References                                                 | page 11 |

## Synthetic procedures

2-Bromo-5-iodopyridine, 2-bromo-5-(trimethylsilylethynyl)pyridine, 5-(trimethylsilylethynyl)-2,2'-bipyridine and 5-ethynyl-2,2'-bipyridine were prepared according to literature and the characterization matched with the data given therein.

### *2-Bromo-5-iodopyridine (2)*<sup>1</sup>

$\delta$  = 8.57 (d,  $J$  = 1.92 Hz, 1H), 7.81 (dd,  $J$  = 8.27 Hz, 2.27 Hz, 1H), 7.27 (d,  $J$  = 8.40 Hz, 1H)  
 $\delta$  = 156.15, 146.55, 141.42, 129.94, 91.68;  
APCI [M+H]<sup>+</sup>: 284 m/z

### *2-Bromo-5-(trimethylsilylethynyl)pyridine (3)*<sup>2</sup>

$\delta$  = 8.43 (s, 1H), 8.59-8.54 (d,  $J$  = 7.93 Hz, 1H), 7.45-7.40 (d,  $J$  = 8.02 Hz, 1H), 0.26 (s, 9H);  
 $\delta$  = 153.15, 141.59, 141.28, 127.87, 120.01, 100.44, 100.31, 0.08;  
APCI [M+H]<sup>+</sup>: 256 m/z

### *5-(Trimethylsilylethynyl)-2,2'-bipyridine (4)*<sup>3</sup>

$\delta$  = 8.72 (s, 1H), 8.65-8.68 (d,  $J$  = 4.3 Hz, 1H), 8.42-8.34 (m, 2H), 7.88-7.84 (dd,  $J$  = 8.3 Hz, 1.5 Hz, 1H), 7.84-7.77 (m, 1H), 7.33-7.27 (m, 1H), 0.27 (s, 9H);  
 $\delta$  = 152.14, 149.24, 139.94, 137.20, 124.08, 121.59, 120.35, 101.93, 99.30, 0.03;  
APCI [M+H]<sup>+</sup>: 253 m/z

### *5-Ethynyl-2,2'-bipyridine (5)*<sup>3</sup>

$\delta$  = 8.77 (s, 1H), 8.71-8.86 (d,  $J$  = 4.2 Hz, 1H), 8.45-8.41 (d, 2H,  $J$  = 8.0 Hz), 7.93-7.89 (dd,  $J$  = 8.2 Hz, 1.3 Hz, 2H), 7.88-7.83 (t,  $J$  = 7.4 Hz, 1H), 7.37-7.32 (m, 1H); 3.30 (s, 1H)  
 $\delta$  = 155.50, 155.40, 152.30, 149.40, 140.10, 137.10, 124.20, 121.50, 120.40, 119.20, 81.5, 80.80;  
APCI [M+H]<sup>+</sup>: 181 m/z

### *9H-Bis(5-ethynyl-2,2'-bipyridin)methylen-4,5-diazafluoren (7)*

100 mg (300  $\mu$ mol) dibromoolefin **6** and 21 mg (18  $\mu$ mol) [Pd(PPh<sub>3</sub>)<sub>4</sub>] were suspended in 30 ml toluene and 8 ml di-*iso*-propylamine. 107 mg (5990  $\mu$ mol) ethynylbipyridine **5** together with 6 mg (30  $\mu$ mol) CuI were added to the mixture and the reaction heated up to 90 °C over night. After cooling to room temperature the mixture was hydrolysed with demineralized water and extracted with chloroform (3 x 15 ml). The combined organic phases were washed with sat. aqueous NH<sub>4</sub>Cl solution (3 x 15 ml) and sat. NaCl solution (1 x 20 ml). The organic phase was dried over MgSO<sub>4</sub>, filtered and the solvent removed under reduced pressure. The product was obtained after silica column chromatography (silica, CHCl<sub>3</sub>/MeOH 20:1) as a yellow solid in 55 % yield.

$\delta$  = 8.86 (dd,  $J$  = 2.10 Hz, 0.81 Hz, 2 H), 8.85 (dd,  $J$  = 6.58 Hz, 1.39 Hz, 2 H), 8.61 (dd,  $J$  = 4.88 Hz, 0.52 Hz, 2 H), 8.58 (dd,  $J$  = 3.53 Hz, 1.40 Hz, 2 H), 8.37-8.32 (m, 4 H), 7.88 (ddd,  $J$  = 13.78 Hz, 6.10 Hz, 1.76 Hz, 2H), 7.41-7.34 (m, 4 H);

$\delta$  = 156.60, 155.21, 155.14, 151.62, 150.49, 148.65, 139.96, 138.21, 132.50, 132.01, 124.74, 123.75, 122.10, 120.92, 119.12, 104.41, 96.33, 91.13;

$\nu$  = 3072, 3027, 2920, 2080, 1645, 1631, 763.

HRMS / ESI (pos): Calculated [C<sub>36</sub>H<sub>21</sub>N<sub>6</sub>] = 537.1822, experimental: 537.1834

Elemental analysis: Calculated: **C** – 80.58, **H** – 3.76, **N** – 15.66;

Experimental: **C** – 76.70, **H** – 4.02, **N** – 15.54;

*[((bpy)<sub>2</sub>Ru(II))<sub>3</sub>[9H-Bis(5-ethynyl-2,2'-bipyridin)methylen-4,5-diazafluoren]-hexakis(hexafluorophosphat)] (8)*

30 mg (56  $\mu$ mol) of **7** were dissolved in 10 ml EtOH and 5 ml CH<sub>2</sub>Cl<sub>2</sub>. To this solution 81 mg (170  $\mu$ mol) [RuCl<sub>2</sub>(bpy)<sub>2</sub>] were added and the mixture heated under reflux for 12 h. The obtained red suspension was cooled to room temperature and an aqueous solution of NH<sub>4</sub>PF<sub>6</sub> was added until no precipitation was observed. The mixture was kept at -18 °C overnight, the precipitation was then filtered and washed with cold water, EtOH and Et<sub>2</sub>O. The product was obtained as a red solid in 50 % yield.

$\delta$  = 8.80-8.60 (m, 18 H), 8.35-8.25 (m, 2 H), 8.20-8.05 (m, 16 H), 8.00-7.90 (m, 8 H), 7.90-7.80 (m, 8 H), 7.78- 7.70 (m, 2H), 7.60-7.45 (m, 14 H);

$\nu$  = 3052, 3017, 2715, 1993, 1585, 1481, 796.

HRMS / MALDI (pos): Matrix (DCTB) Calculated [C<sub>96</sub>H<sub>70</sub>F<sub>30</sub>N<sub>18</sub>OP<sub>5</sub>Ru<sub>3</sub>] = 2521.1319,

Experimental: 2521.1249.

Elemental analysis: Calculated: **C** – 43.57, **H** – 2.59, **N** – 9.53;

Experimental: **C** – 43.68, **H** – 2.59, **N** – 9.20;

# $^1\text{H}$ and $^{13}\text{C}$ NMR spectra

Ligand 7 ( $\text{CDCl}_3/\text{MeOD}_3$  1:2)

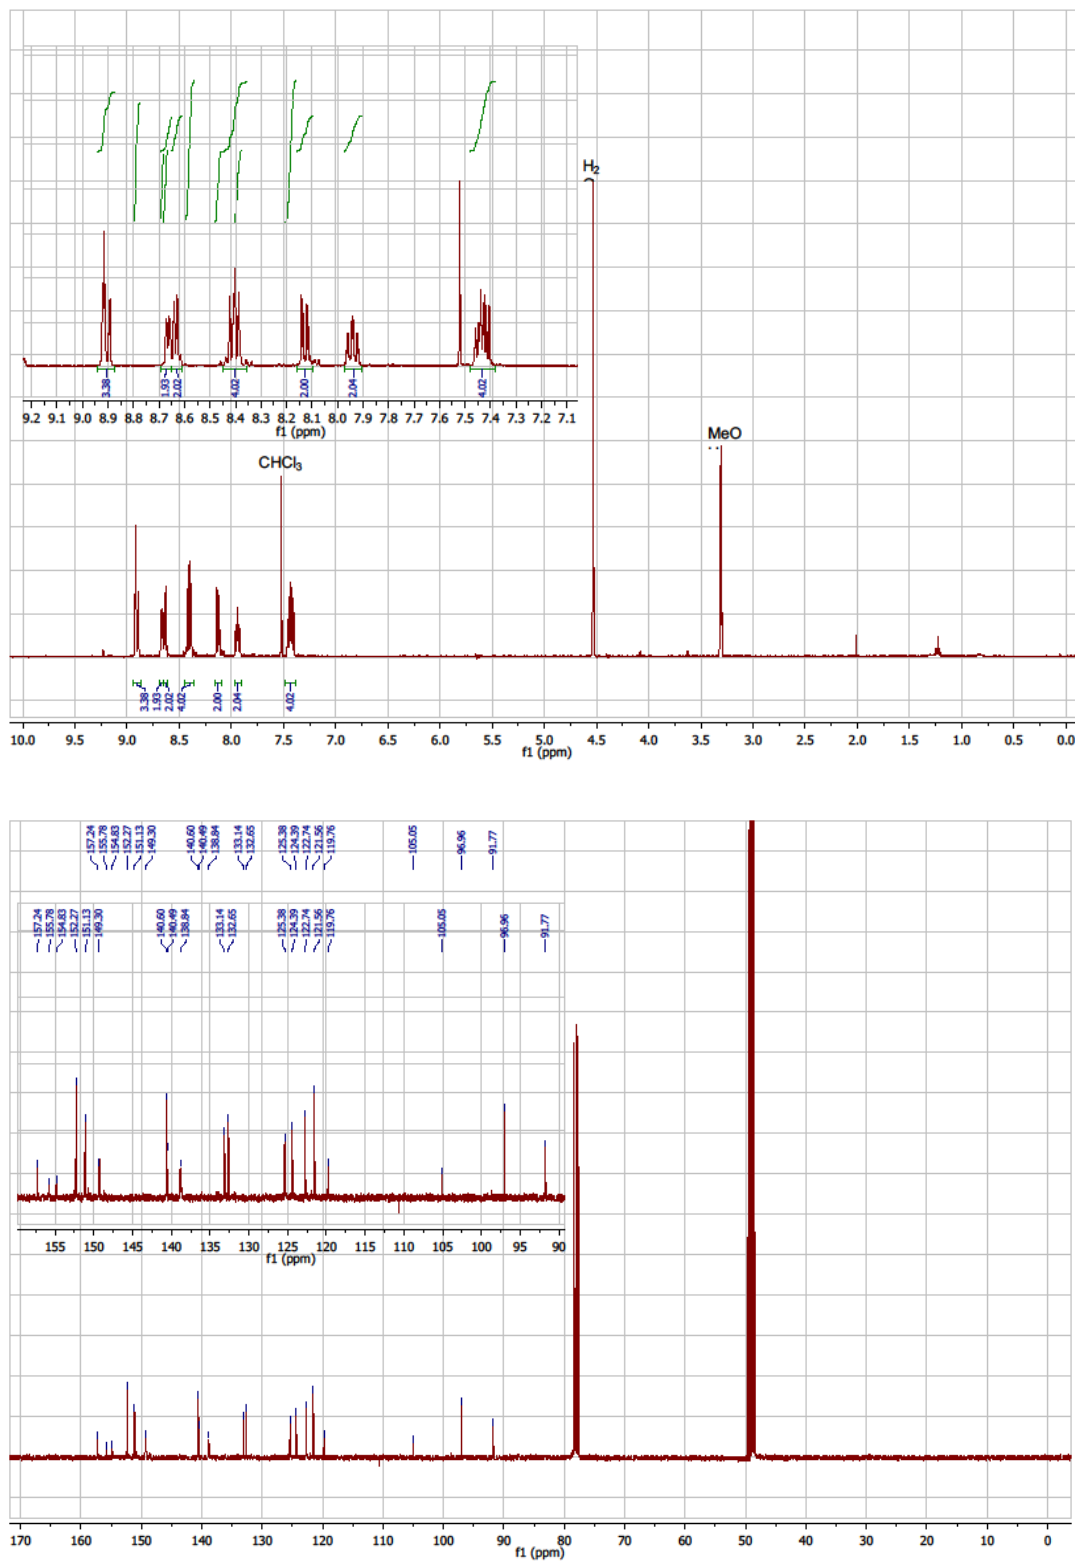

Figure S1:  $^1\text{H}$  and  $^{13}\text{C}$  NMR of 7.

$^1\text{H}$  NMR of complex **8** ( $\text{MeOD}_3$ )

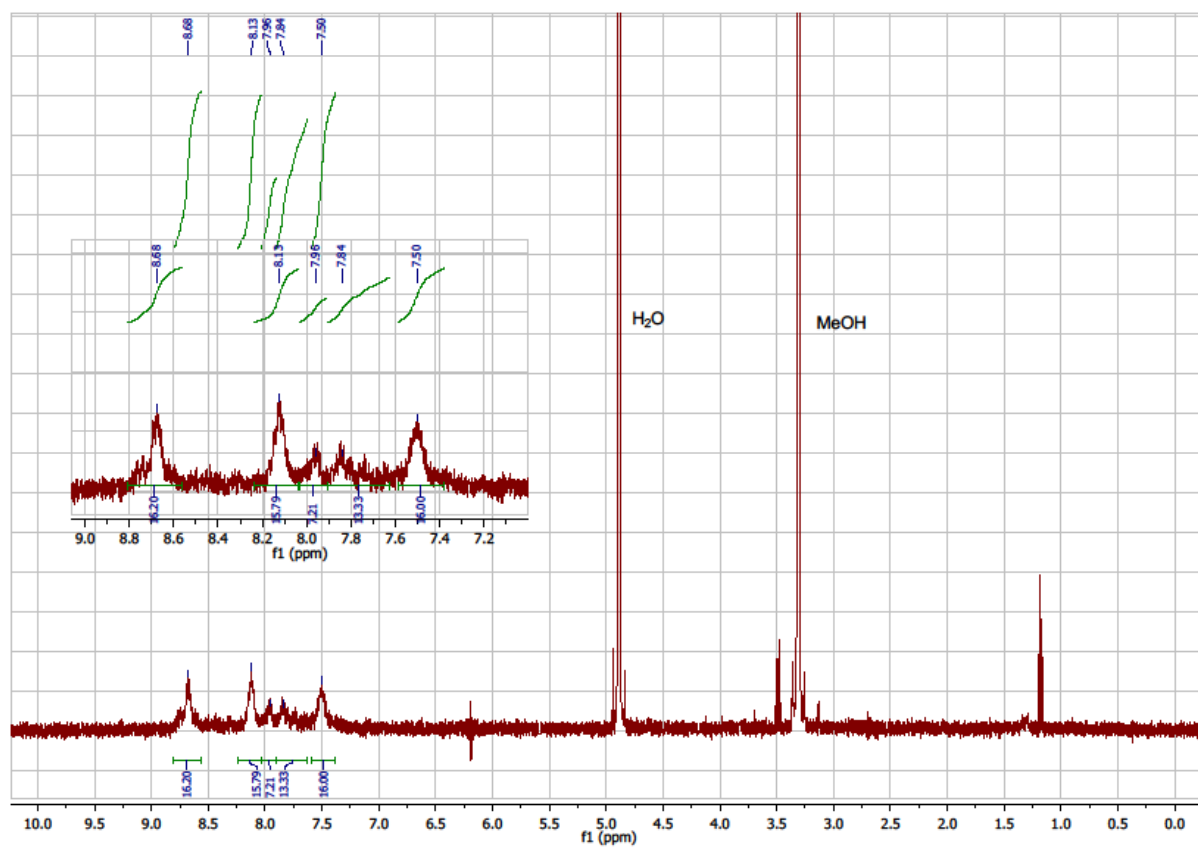

Figure S2::  $^1\text{H}$  NMR of **8**.

## Mass spectrometry data

High resolution MALDI (pos) with DCTB as matrix for ligand 7.

|               |                                         |            |           |     |
|---------------|-----------------------------------------|------------|-----------|-----|
| Analysis Name | D:\Data\AG-Faust\Naurozi\DNA-BW10e-HR.d | Operator   | Fuermeier |     |
| Method        | esi_tune.m                              | Instrument | micrOTOF  | 100 |
| Sample Name   | DNA-BW10e-HR                            |            |           |     |
| Comment       | 10 ug/mL ACN/H2O 1:1                    |            |           |     |

| Acquisition Parameter |          |                |          |                    |        |
|-----------------------|----------|----------------|----------|--------------------|--------|
| Source Type           | ESI      | Ion Polarity   | Positive | Set Corrector Fill | 49 V   |
| Scan Range            | n/a      | Capillary Exit | 150.0 V  | Set Pulsar Pull    | 397 V  |
| Scan Begin            | 50 m/z   | Hexapole RF    | 350.0 V  | Set Pulsar Push    | 397 V  |
| Scan End              | 3000 m/z | Skimmer 1      | 50.0 V   | Set Reflector      | 1300 V |
|                       |          | Hexapole 1     | 21.7 V   | Set Flight Tube    | 9000 V |
|                       |          |                |          | Set Detector TOF   | 1980 V |

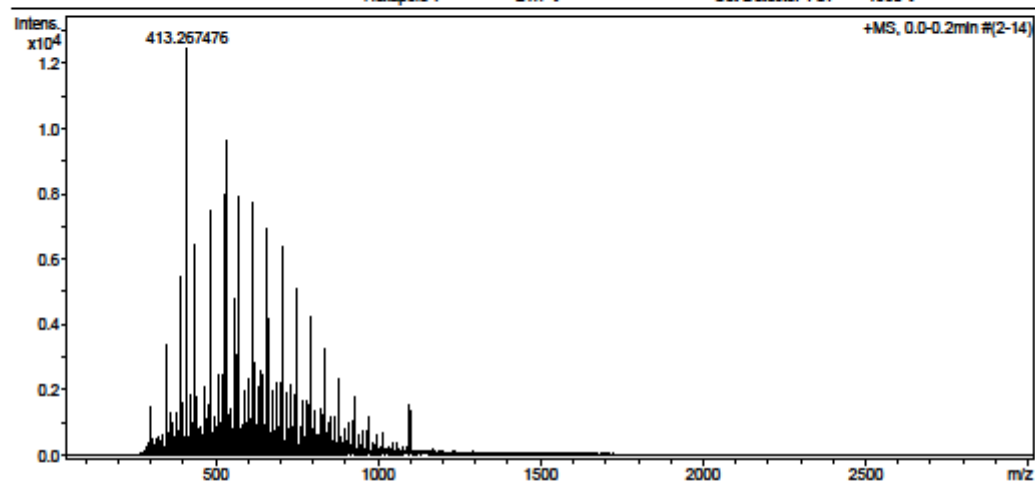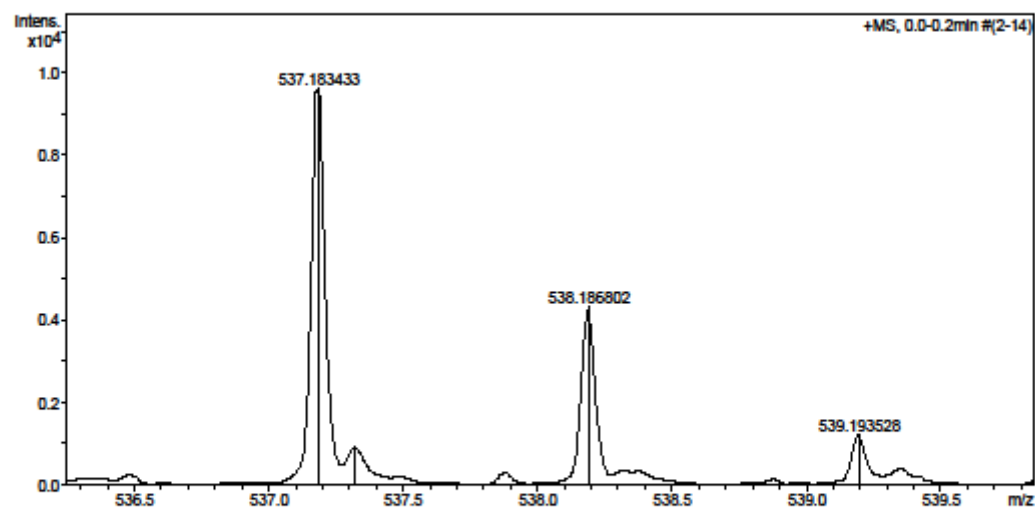

Figure S3: High resolution MALDI (pos) of 7.

APCI [M+H]<sup>+</sup> for ligand 7.

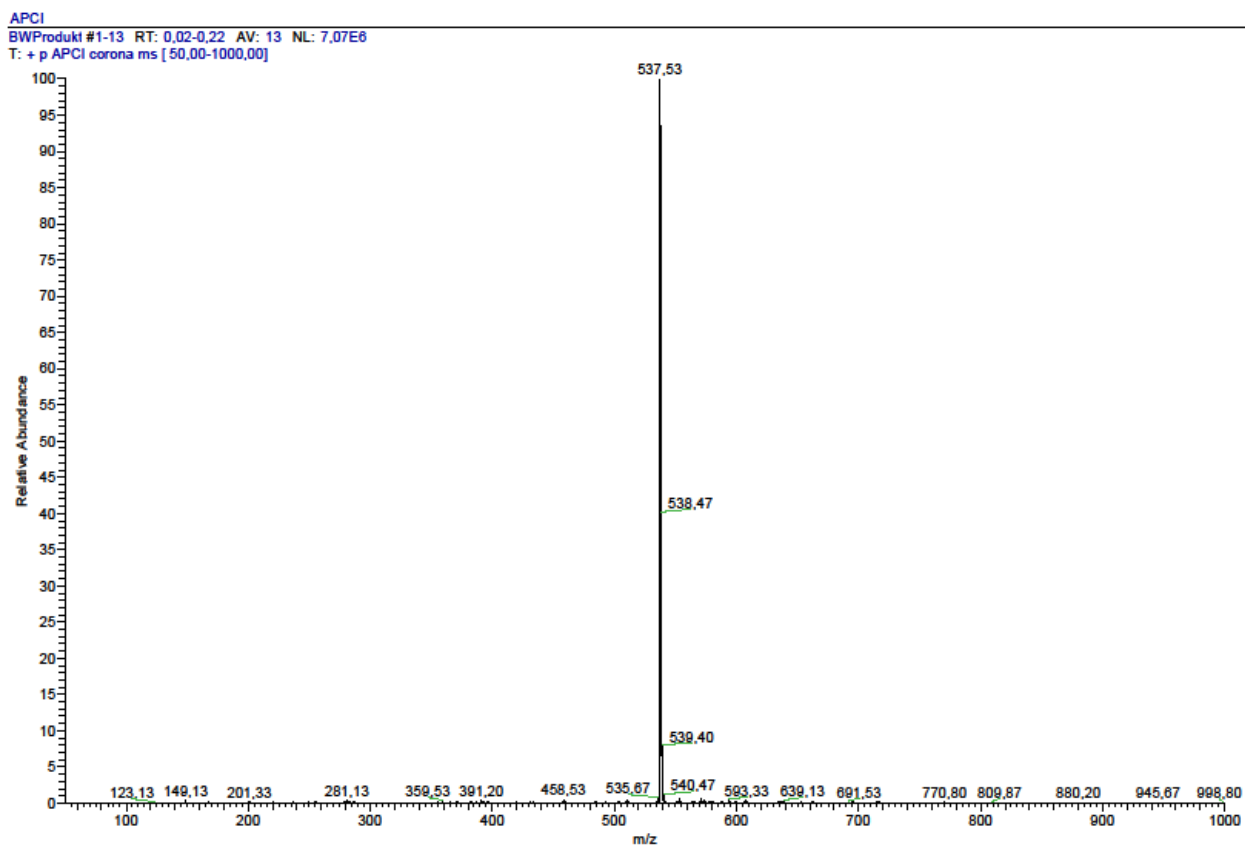

Figure S4: APCI of 7.

# High resolution MALDI (pos) with DCTB as matrix for complex **8**.

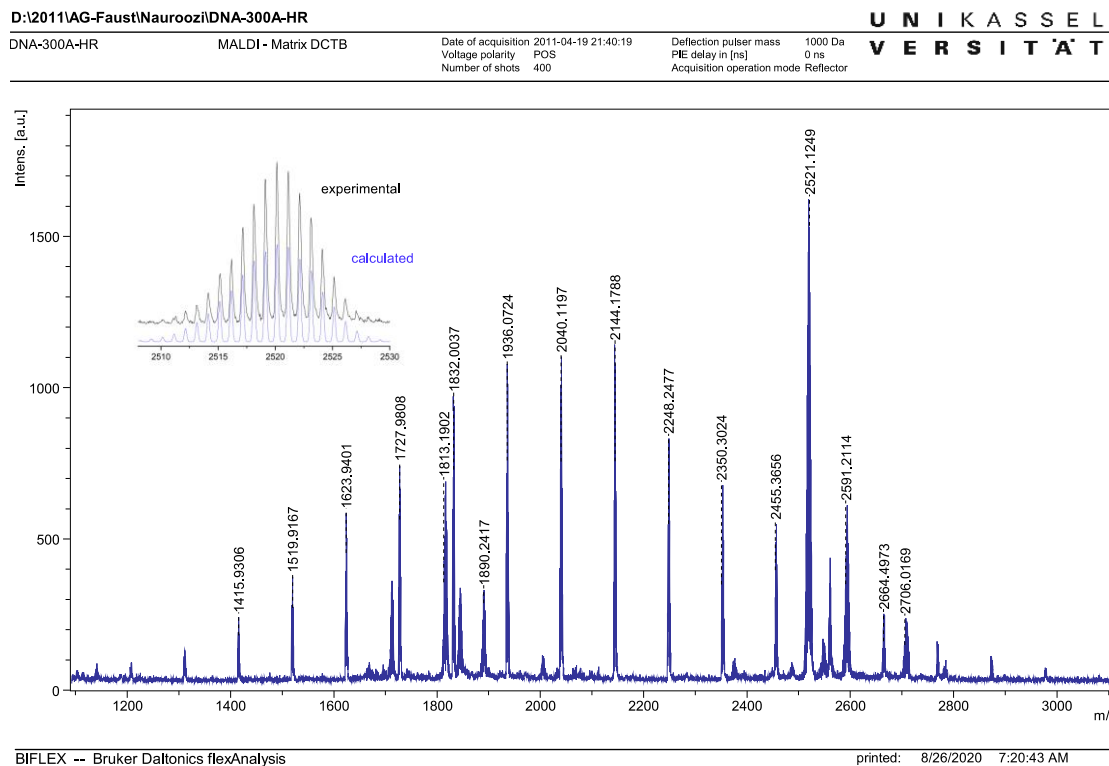

Figure S5: High resolution MALDI (pos) of **8**.

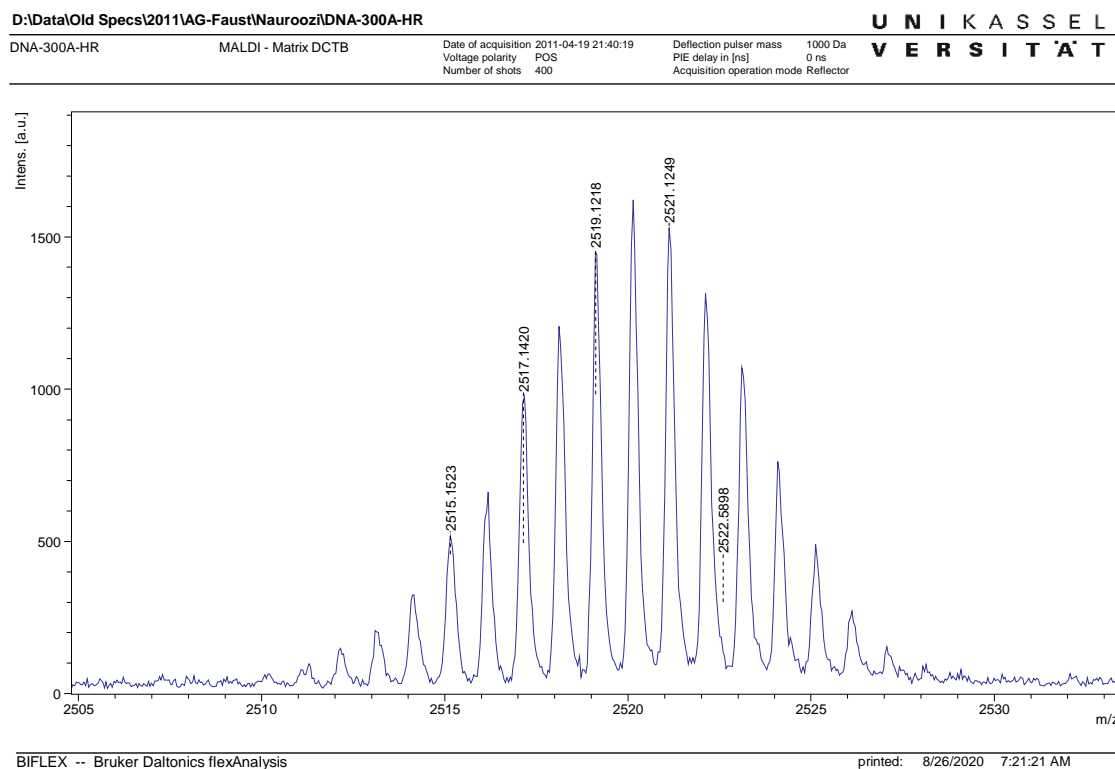

Figure S6: Isotopic pattern of complex **8**.



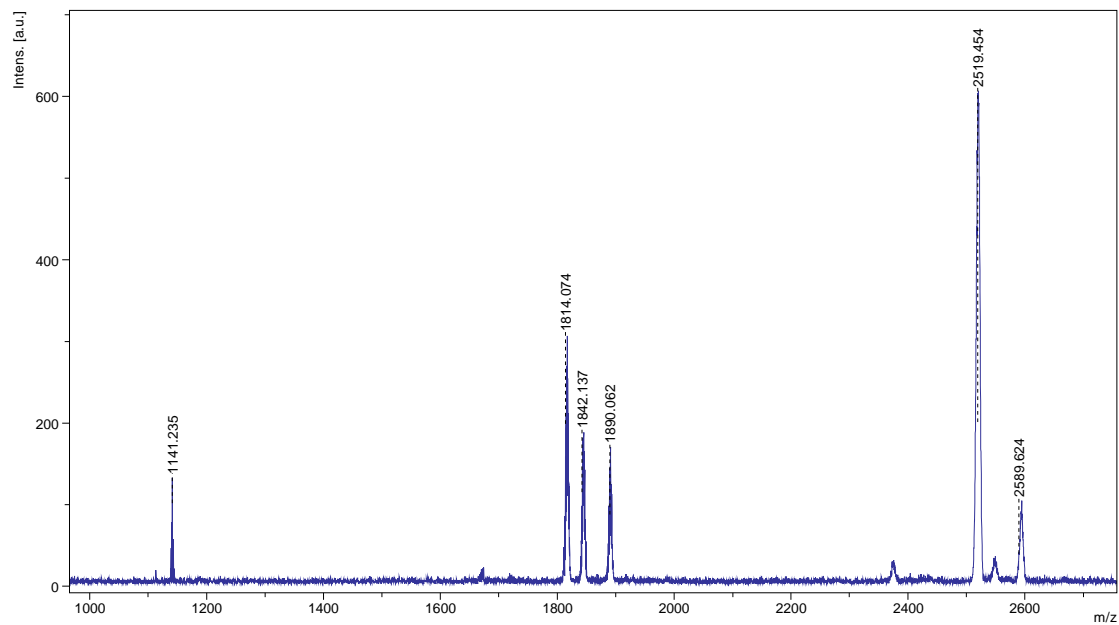

Figure S7: High resolution MALDI (pos) of **8** subtracted by signals of polymeric matrix.

## UV-vis absorption spectrum of (5-ethynyl)-2,2'-bipyridine

In  $\text{CH}_2\text{Cl}_2$  at room temperature.

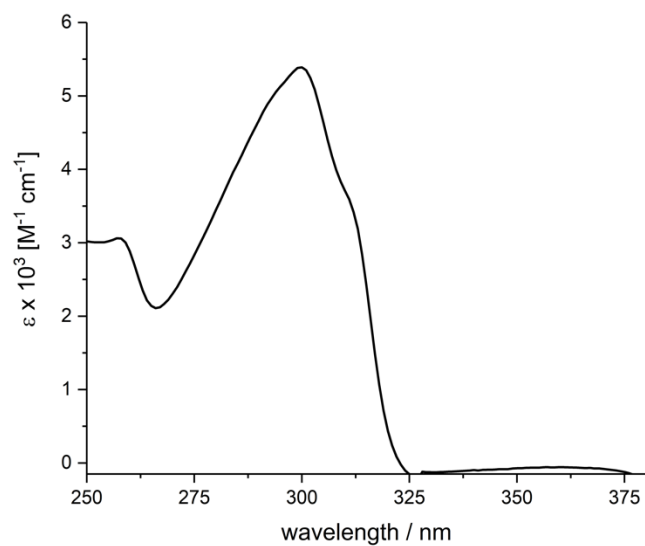

Figure S8: UV-vis spectrum of (5-ethynyl)-2,2'-bipyridine.

## Cyclic voltammetry of (5-ethynyl)-2,2'-bipyridine

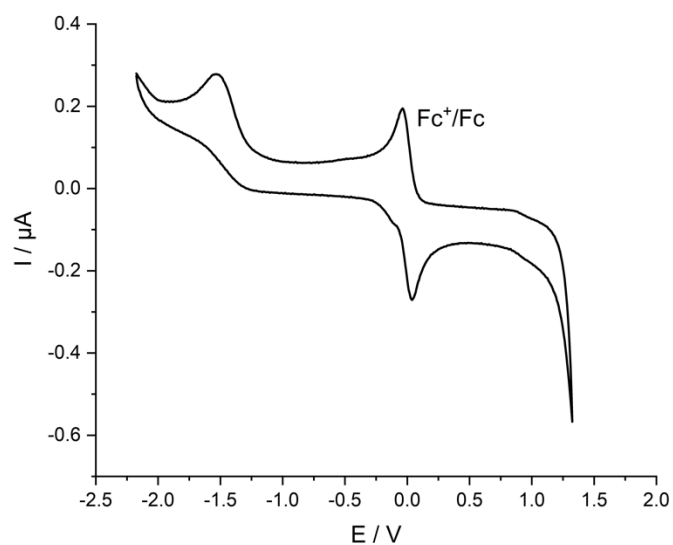

Figure S9: Cyclic voltammogram of (5-ethynyl)-2,2'-bipyridine in  $\text{CH}_2\text{Cl}_2$  containing 0.1 M  $n\text{Bu}_4\text{NPF}_6$  with Ag/AgCl as reference electrode, Pt wire as counter electrode and Pt disc as working electrode. Scan rate  $150 \text{ mV s}^{-1}$ . Data referenced against  $\text{Fc}^+/\text{Fc}$ .

## Differential Pulse Voltammogram of 8

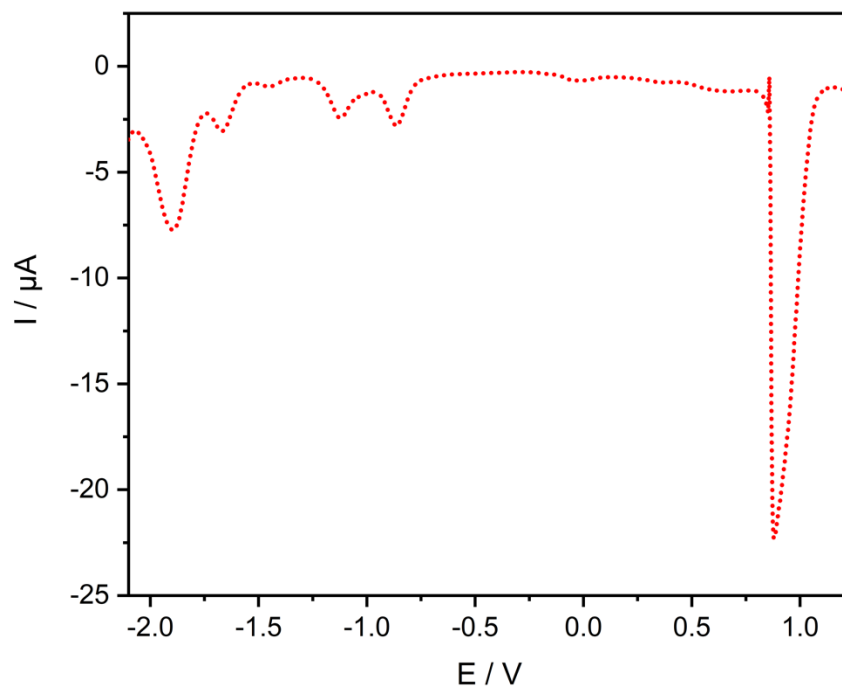

Figure S10: Differential pulse voltammogram of **8** in CH<sub>2</sub>Cl<sub>2</sub> containing 0.1 M <sup>n</sup>Bu<sub>4</sub>NPF<sub>6</sub> with Ag/AgCl as reference electrode, Pt wire as counter electrode and glassy carbon as working electrode. Scan rate 50 mV s<sup>-1</sup>. Data referenced against Fc<sup>+</sup>/Fc.

## References

- 1 A. Boillon, J. Lancelot, V. Collot, P. Bovy, S. Rault, *Tetrahedron* 2002, 2885.
- 2 V. Grosshenny, F. Romero, R. Ziessel, *J. Org. Chem.* 1997, **62**, 1491.
- 3 A. Lützen, M. Hapke, *Eur. J. Org. Chem.* 2002, 2292-2297.
